# Metagenomic analysis with strain-level resolution reveals fine-scale variation in the human pregnancy microbiome

Daniela S. Aliaga Goltsman<sup>\*1,2</sup>, Christine L. Sun<sup>\*1,2</sup>, Diana M. Proctor<sup>3,4</sup>, Daniel B. DiGiulio<sup>1,3,4</sup>, Anna Robaczewska<sup>1,4</sup>, Brian C. Thomas<sup>5</sup>, Gary M. Shaw<sup>1,6</sup>, David K. Stevenson<sup>1,6</sup>, Susan P. Holmes<sup>7</sup>, Jillian F. Banfield<sup>5,8</sup>, David A. Relman<sup>#1,2,3,4</sup>

<sup>1</sup>March of Dimes Prematurity Research Center at Stanford University, Stanford, California 94305, USA

<sup>2</sup>Department of Microbiology & Immunology, Stanford University School of Medicine, Stanford, California 94305, USA

<sup>3</sup>Department of Medicine, Stanford University School of Medicine, Stanford, California 94305, USA

<sup>4</sup>Infectious Diseases Section, Veterans Affairs Palo Alto Health Care System, Palo Alto, California 94304, USA

<sup>5</sup>Department of Earth and Planetary Science, University of California, Berkeley, California, 94720, USA

<sup>6</sup>Department of Pediatrics, Stanford University School of Medicine, Stanford, California 94305, USA

<sup>7</sup>Department of Statistics, Stanford University, Stanford, California 94305, USA

<sup>8</sup>Earth and Environmental Science, Lawrence Berkeley National Laboratory, Berkeley, California 94720, USA

\*Authors contributed equally

#Corresponding author: relman@stanford.edu

Running title: Metagenomics of the microbiome during pregnancy

Keywords: pregnancy; human microbiome; metagenomics; vagina; intestinal tract; mouth;

*Lactobacillus*; *Gardnerella vaginalis*; CRISPR Cas; gestational outcome

## ABSTRACT

Recent studies suggest that the microbiome has an impact on gestational health and outcome. However, characterization of the pregnancy-associated microbiome has largely relied on 16S rRNA gene amplicon-based surveys. Here, we describe an assembly-driven, metagenomics-based, longitudinal study of the vaginal, gut, and oral microbiomes in 292 samples from ten subjects sampled every three weeks throughout pregnancy. 1.53 Gb of non-human sequence was assembled into scaffolds, and functional genes were predicted for gene- and pathway-based analyses. Vaginal assemblies were binned into 97 draft quality genomes. Redundancy analysis (RDA) of microbial community composition at all three body sites revealed gestational age to be a significant source of variation in patterns of gene abundance. In addition, health complications were associated with variation in community functional gene composition in the mouth and gut. The diversity of *Lactobacillus iners*-dominated communities in the vagina, unlike most other vaginal community types, significantly increased with gestational age. The genomes of co-occurring *Gardnerella vaginalis* strains were recovered in samples from two subjects and demonstrated distinct rates of replication during pregnancy. Interestingly, in seven subjects, gut samples contained strains of the same *Lactobacillus* species that dominated the vaginal community of that same subject, and not other *Lactobacillus* species; however, these within-host strains were divergent. CRISPR spacer analysis suggested shared phage and plasmid populations across body sites and individuals. This work underscores the dynamic behavior of the microbiome during pregnancy and suggests the potential importance of understanding the sources of this behavior for fetal development and gestational outcome.

The importance of microorganisms in human nutrition, immune function, and physiology is well known (Fujimura et al. 2010; Garrett et al. 2010; Charbonneau et al. 2016), and disturbance (such as antibiotic use and disease) has important effects on the microbiome (Cho and Blaser; Costello et al. 2012). Pregnancy is a natural disturbance that can be understood as  
5 a special immune state. During gestation, significant hormonal, physiological, and immunological changes allow for, and promote the growth of a developing fetus (Nuriel-Ohayon et al. 2016). For example, some of the changes that occur in pregnancy resemble metabolic syndrome (weight gain, glucose intolerance, and low-level inflammation, among other symptoms). Given the roles of the microbiome during other states of health, it is presumed to  
10 provide fundamental support for fetal development as well (Charbonneau et al. 2016). Despite this, few studies of the human microbiome in pregnancy, beyond community composition-based analyses, have been reported. One study investigating the gut microbiota at one time point during each of the first and third trimesters suggested that community composition changes during pregnancy (Koren et al. 2012). Similarly, abundances of viable counts of common oral  
15 bacteria have been found to be altered during gestation, especially during early pregnancy, compared to non-pregnant women (Nuriel-Ohayon et al. 2016). However, a detailed longitudinal 16S ribosomal RNA (rRNA) gene survey of the gut and oral microbiota from 49 women during pregnancy demonstrated relative stability over time (DiGiulio et al. 2015).

The vaginal community composition (microbiota) of pregnant and non-pregnant  
20 individuals has been classified into community state types (CST) based on the presence and relative abundance of organisms surveyed using the 16S rRNA gene (Ravel et al. 2011; Hickey et al. 2012; DiGiulio et al. 2015). More recently, an alternative classification for vaginal communities was proposed based on the frequency of *Lactobacillus iners*, *Lactobacillus crispatus*, and *Gardnerella vaginalis* (Callahan et al. 2017). Surveys of vaginal community  
25 composition based on 16S rRNA gene amplicons have reported relative stability throughout gestation, although transitions between CSTs within subjects have been observed (Aagaard et al. 2012; Gajer et al. 2012; Romero et al. 2014; DiGiulio et al. 2015). In addition, surveys have

established associations between the vaginal microbiota and race/ethnicity (Hillier et al. 1995; Zhou et al. 2007; Ravel et al. 2011; Human Microbiome Project 2012; Hyman et al. 2014) and, more recently, associations with premature birth (Callahan et al. 2017).

Despite this recent attention to the microbiome during pregnancy, relatively few studies have discriminated among bacterial strains, and few have described the phage populations in the human microbiome during pregnancy. It is well known that phage can modulate microbial communities via predation and lateral gene transfer (Fuhrman 1999; Canchaya et al. 2003; Brussow et al. 2004; Weinbauer and Rassoulzadegan 2004). Since CRISPR spacers are mainly derived from phage, plasmids, and other mobile elements (reviewed extensively in Horvath and Barrangou 2010; Karginov and Hannon 2010; Marraffini and Sontheimer 2010), the CRISPR-Cas system can be used to identify these sequences (Bolotin et al. 2005; Mojica et al. 2005; Pourcel et al. 2005; Andersson and Banfield 2008; Sun et al. 2016). Spacers reflect exposures to phage and plasmids and thus provide an indirect method for examining these populations in a whole community metagenomic dataset.

The goal of this work was to survey the genome content and functional potential of microbial communities during gestation. We describe the vaginal, gut and oral microbiomes from ten pregnant subjects from first trimester through delivery. Results show specific patterns of the community structure with strain-level resolution, as well as trends with gestational age, and thus contribute towards a more complete understanding of the functional potential and the dynamics of the human microbiome during pregnancy.

## RESULTS

### *Community structure from assembly-driven metagenomics*

Ten pregnant women whose microbiota have been studied previously using 16S rRNA gene amplicon data (DiGiulio et al. 2015) were selected for further gene and genome composition analysis. Subjects were selected in part based on their compliance in providing samples on a regular basis from multiple body sites. Six subjects delivered at term and four

delivered preterm (i.e., <37 weeks gestation). Five subjects (four who delivered at term, and one who delivered preterm) were diagnosed with having some type of pregnancy complication: preeclampsia, Type II diabetes, and oligohydramnios (Supplemental Table S1).

5 Shotgun metagenomic sequencing was performed on 292 vaginal, oral, and gut samples that had been collected, on average, every three weeks over the course of gestation (Table 1; Supplemental Table S1). Community composition and estimates of diversity were evaluated from full-length 16S rRNA gene sequences that were reconstructed from metagenomics reads using EMIRGE (Dick et al 2009), and from the average number of single copy ribosomal protein

|                            | Vagina  | Gut       |        | Saliva <sup>10</sup> |
|----------------------------|---------|-----------|--------|----------------------|
|                            |         | Stool     | Rectal |                      |
| Samples analyzed           | 101     | 34        | 56     | 101                  |
| Reads sequenced (M)        | 3478    | 609       | 1212   | 1903                 |
| Ave. reads per sample (M)  | 34      | 18        | 22     | 19                   |
| Ave. human contamination   | 97%     | 32%       | 42%    | 82%                  |
| Bases assembled, >1 Kb (M) | 177     | 2900      |        | 1345                 |
| GC (%) range               | 25 - 63 | 25 - 61   |        | 28 - 66              |
| Max coverage               | 1175    | 996       |        | 138                  |
| Average richness*          | 9 (±2)  | 101 (±15) |        | 42 (±11)             |
| ORFs predicted (M)         | 0.19    | 3.13      |        | 1.60                 |

**Table 1. Metagenomic sequencing statistics.** Stool and rectal swab sequences were combined during co-assembly per subject. Average richness\* (genome types) was estimated from the average number of single-copy ribosomal protein sets. M, million.

(RP) sets encoded in assembled scaffolds. Based on reconstructed 16S rRNA gene sequences, 1,553 taxa (clustered at 97% identity) were identified. In total, 22,737 predicted proteins annotated as one of the 16 RPs described for phylogenetic classification in (Hug et al. 2016) were encoded in 4,650 assembled scaffolds at all body sites. The RP

20 sets were clustered at 99% average amino acid identity (AAI) into 4,024 taxa (see methods) (Table 1).

Estimates of richness and evenness from reconstructed 16S rRNA genes differed depending on body site: vaginal communities were the least diverse and gut communities were the most diverse (Supplemental Fig. S1A). Vaginal communities appeared to be largely under-  
25 sampled with the metagenomic data in comparison to the previously-published 16S rDNA amplicon data (Digiulio et al. 2015), perhaps due to high levels of human sequence contamination in the metagenomic data (Supplemental Fig. S1B, vagina). It is also possible that

the 16S rDNA amplicon approach leads to higher richness than expected. By contrast, gut communities showed higher richness and evenness (visualized as the slope of the curves) when viewed with metagenomics than with 16S rRNA gene surveys (Supplemental Fig. S1B, gut), possibly due to higher resolution from deep sequencing in the metagenomics data, and/or from the so-called 'universal' 16S rRNA gene primers not amplifying all microbial targets. On the other hand, the richness of the oral communities recovered from metagenomics appeared to approximate that observed in 16S rDNA amplicon (Supplemental Fig. S1B, saliva).

Unlike gut or salivary communities, vaginal communities were generally dominated by one organism, based on whole genome abundance measures (Fig. 1A) and reconstructed 16S rRNA gene analysis (Supplemental Fig. S2A). Strikingly, communities dominated by *L. iners* showed a visible increase in taxonomic richness towards the end of pregnancy (subjects Term2, Term3, Term4, and Pre4) while those dominated by *L. crispatus* remained stable over time (subjects Term5, Term6, Pre1, and Pre3). To validate independently the observed association between increasing community richness and community domination by *L. iners*, we re-analyzed the 16S rRNA amplicon data reported previously (DiGiulio et al. 2015; Callahan et al. 2017) (Stanford cohort and UAB cohort, respectively) (Supplemental Fig. S2B; Supplemental Fig. S3). Shannon's diversity significantly increased with gestational age in *L. iners* dominated samples in both the UAB ( $F = 5.9921$ ,  $p = 0.0146$ ) and Stanford ( $F = 29.54916$ ,  $p < 0.0001$ ) cohorts. On the other hand, Shannon's diversity increased as a function of gestational age in *L. crispatus*-dominated samples in the Stanford cohort ( $F = 7.505883$ ,  $p = 0.0066$ ) but not in the UAB cohort (Supplemental Fig. S3A). Collectively, these data suggest dynamic vaginal community composition over the course of gestation.

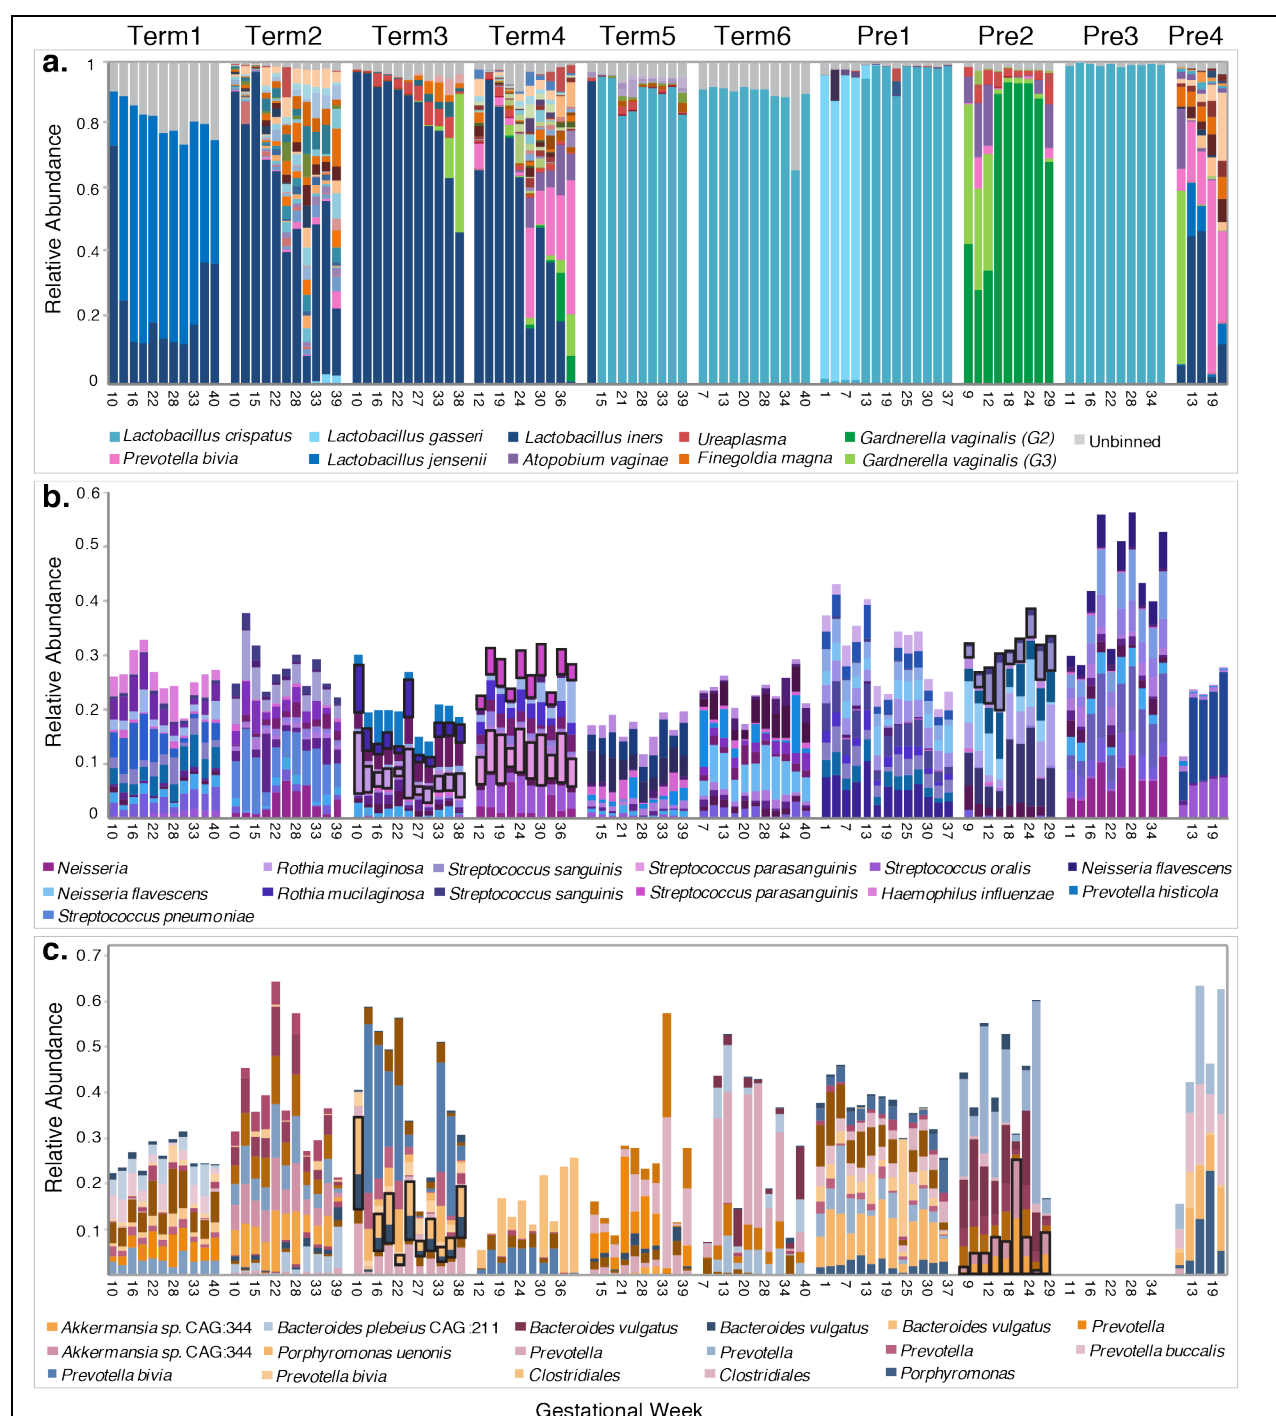

**Figure 1. Community structure of the pregnancy microbiome over time in 10 subjects.** a) Relative abundance of vaginal genome bins (y axis). Abundance was estimated from the number of reads that mapped to each bin and normalized by the length of the bin. The top 10 most abundant vaginal taxa are displayed (see key at bottom). Unbinned: sequences that were not assigned to a classified genome bin. b) and c) Relative abundance (y axis) of the top 50 most abundant taxa across all subjects in saliva (b) and gut (c) samples, respectively. Gut samples from subject Pre3 were not available. Species abundance was estimated from the average read counts of single-copy

ribosomal protein (RP) sets (at least one of 16), summed over scaffolds sharing RPs clustered at 99% amino acid identity. Each taxon is represented by a distinct color (see key for selected taxa at bottom) and is classified at the most resolved level possible. Co-occurring strains of *Rothia mucilaginosa*, *Streptococcus sanguinis*, and *Streptococcus parasanguinis* in (b), and of *Bacteroides vulgatus*, and *Akkermansia* sp. CAG:344 in (c) are highlighted with black boxes.

Due to the high diversity of gut and saliva communities, the relative abundances of 16 single-copy ribosomal protein (RP) sets were used to estimate the dynamics of gut and saliva communities over time. The relative abundances of the most abundant taxa in the gut and saliva showed relative stability over time within subjects but high inter-individual variability (Fig. 1B,C). For example, the 9 most abundant taxa in the saliva samples of subject Term5 were relatively consistent in abundance over all time points, representing at most 20% of the community within that subject, but were distinct from the most abundant taxa in the saliva of the other subjects (Fig. 1B). In addition, strains could be resolved from RP cluster variation within scaffolds, and co-occurring bacterial strains were observed in gut and saliva samples within subjects (Fig. 1B,C, black boxes).

Most taxa identified by 16S rRNA gene reconstruction (classified at 97% average nucleotide identity, or ANI) and RP sets (classified at 99% AAI) were shared between body sites among all subjects, but the level of sharing was most evident between vaginal and gut samples (Supplemental Fig. S1C). Phyla found uniquely in gut samples included the *Bacteria*, Verrucomicrobia and Synergistetes, the *Archaea*, Euryarchaeaota, and the *Eukarya*, Stramenopiles (*Blastocystis homini*); whereas phyla found uniquely in oral samples included the *Bacteria*, Spirochaetes and SR1. Novel taxa were detected in oral and gut samples: three 16S rRNA sequences in saliva could not be classified to a known phylum and three taxa represented by novel RP sets could not be classified at the domain level based on searches in the public databases (Supplemental Fig. S1C). Similarly, six 16S rRNA gene sequences in gut samples could not be classified at the phylum level, and 10 RP sets remained unclassified at the domain level.



### *Sources of variation in community-wide gene profiles*

To gain insights into all potential sources of variation in the patterns of gene abundance across all subjects and samples, non-metric multidimensional scaling (NMDS) was performed on variance-stabilized abundances of gene families represented in the UniRef90 database. NMDS revealed three major sources of variation in the patterns of gene abundance: subject, gestational age, and health complication. Samples clustered primarily based on subject for each body site (Supplemental Fig. S4). In addition, when considering vaginal samples, gestational age was a major source of variation--but only for subjects with high diversity communities. For example, samples from subject Term2 separated along NMDS1 as gestational age increased (Supplemental Fig. S4A). Taxonomic assignment was associated with gene abundance profiles in the vagina. Specifically, gene profiles from *Gardnerella vaginalis* appeared correlated with positive scores on NMDS2 (samples from subject Term4); *L. gasseri*, *Sneathia* and *Prevotella* gene abundances were associated with positive NMDS1 scores (samples from subject Term2); and *Lactobacillus crispatus*, *L. iners*, and *L. jensenii* gene abundances were associated with negative scores along NMDS2 (samples from all other subjects) (Fig. 2B). Finally, in oral and gut communities, health complication explained some variation in community gene composition: samples from the 3 subjects who were diagnosed with preeclampsia (two term and one preterm) appeared to cluster separately from samples collected from subjects with other health states and pregnancy outcomes (Fig. 2C,D).

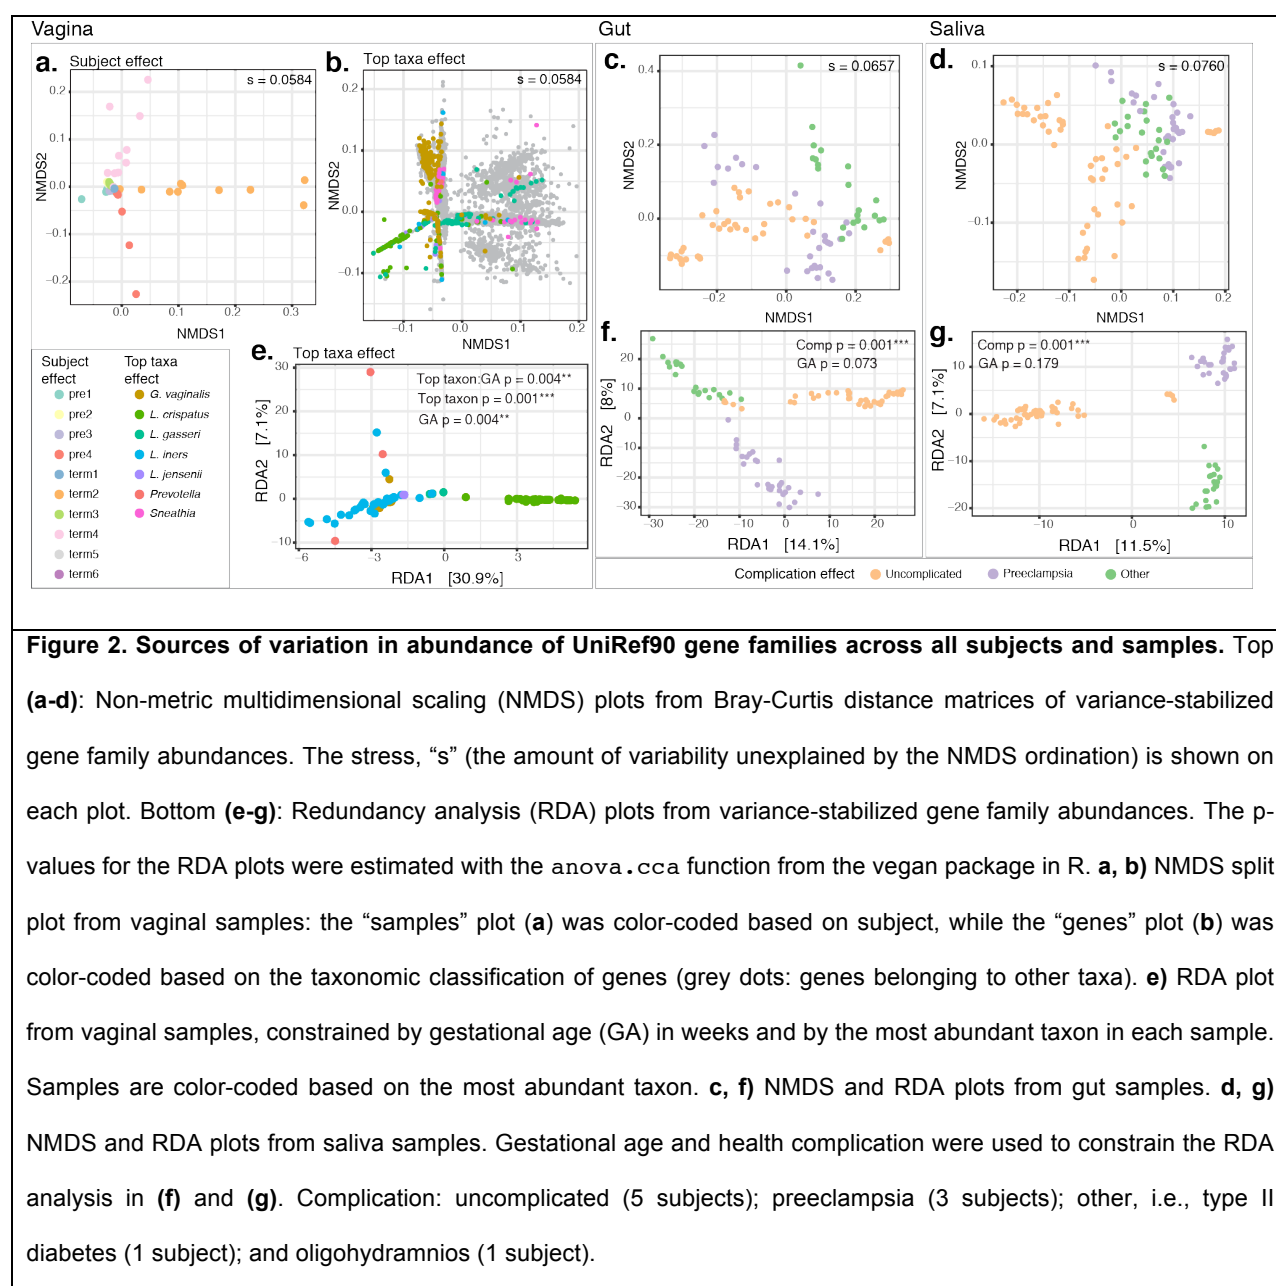

To quantify the relative influence of gestational age, dominant taxon (vaginal microbiota), and health complication on community composition, redundancy analysis (RDA) was performed on variance-stabilized gene family abundances. Although the effect of gestational age was significant only for vaginal communities ( $F = 2.71$ ,  $p = 0.017$ ) when data from all subjects and samples were considered (Figs. 2E-G), gestational age trends were significant at all body sites and for most subjects, and showed stronger effects, when the data for each subject were

examined separately (Fig. 3; Supplemental Fig. S5). For vaginal samples, significant trends with gestational age were observed even in low-diversity communities dominated by *L. crispatus* (subjects Pre1 and Pre3) (Supplemental Fig. S5A). The most abundant taxon in vaginal communities, and health complication (preeclampsia, diabetes, oligohydramnios, or uncomplicated pregnancy) in gut and oral communities were highly significant sources of variation in gene family abundances based on RDA of the overall data (vagina:  $F = 14.97$ ,  $p = 0.001$ ; saliva:  $F = 11.20$ ,  $p = 0.001$ ; gut:  $F = 12.34$ ,  $p = 0.001$ ) (Fig. 2E-G), although the numbers of subjects with each of these complications were small.

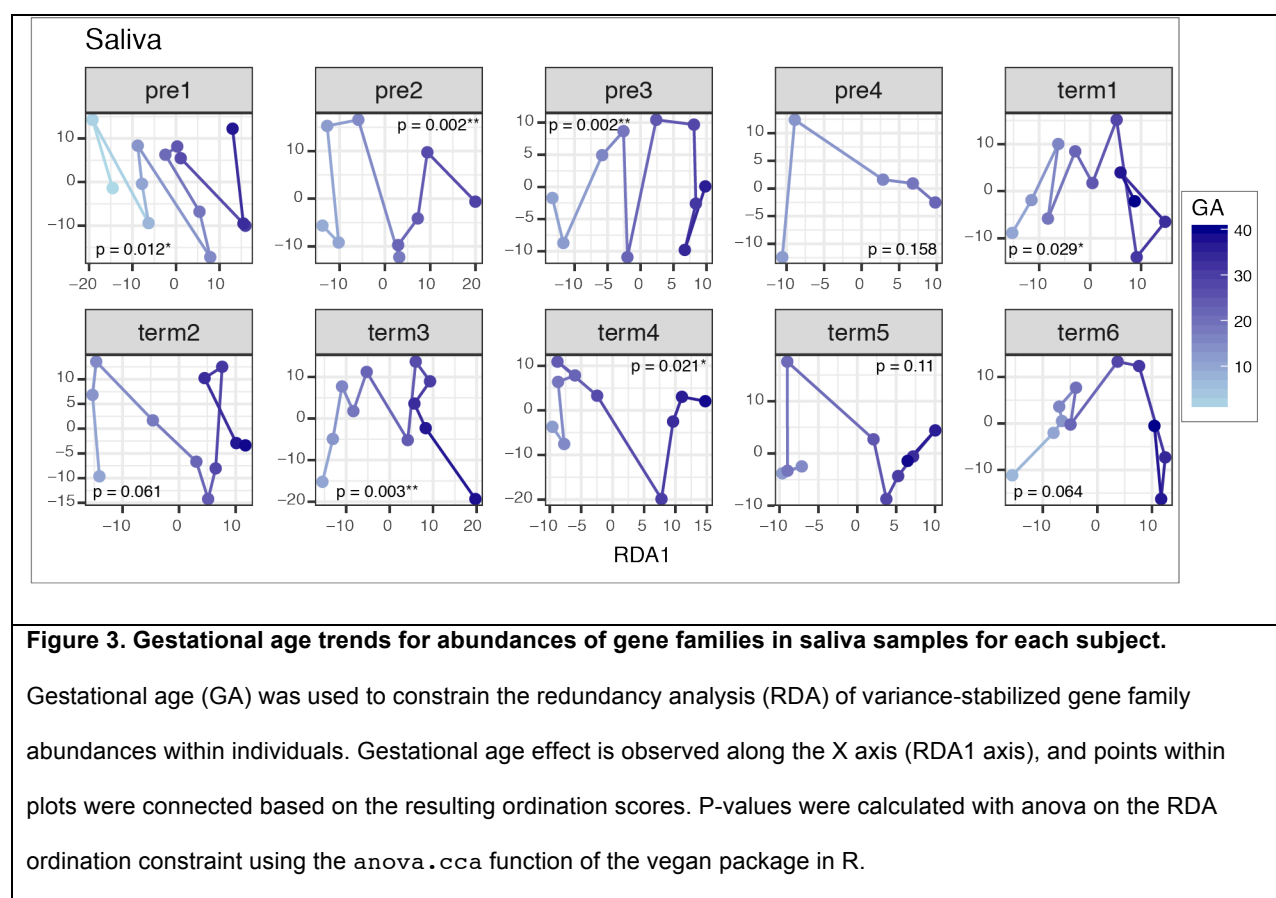

Overall pathway composition and abundance remained stable over time at all body sites when all subjects were viewed together (Supplemental Fig. S6, top plots). Not surprisingly, core metabolic pathways consistently accounted for most of the overall pathway composition and

abundance in all subjects. When pathways were viewed individually, their abundance was stable over time (e.g., glycolysis at all body sites, Supplemental Fig. S6, bottom plots); however, some pathways were variable over gestational age. For example, the relative abundance of the pathway, enterobactin biosynthesis (a siderophore-mediated iron uptake system (Raymond et al. 2003)), decreased towards the end of pregnancy in most gut and oral samples. Yet, the enterobactin biosynthesis pathway identified in some samples remain stable at low basal levels (ENTBACSYN, Supplemental Fig. S6, Gut, bottom plots). The results suggest that iron may have been in plentiful supply as pregnancy progressed in the oral and gut sites, enriching for organisms without enterobactin biosynthesis capabilities. In addition, the increasing relative abundance of the pyruvate fermentation to acetate and lactate pathway towards the end of pregnancy in gut samples (PWY-5100, Supplemental Fig. S6, Gut), suggests that fermenters might become enriched in the gut during pregnancy.

### *Gardnerella vaginalis* strains co-occur in the vagina

*Gardnerella vaginalis* is an important species associated with bacterial vaginosis (Schwebke et al. 2014) and with an increased risk of preterm birth (Callahan et al. 2017). The near-complete draft genomes of six strains of *G. vaginalis* from the vaginal samples of four subjects were recovered in this study (Fig. 1A, colored light and dark green). *G. vaginalis* genomes were abundant early in pregnancy in two subjects who delivered preterm (Pre2 and Pre4), and they dominated samples later in pregnancy in two subjects who delivered at term (Term3 and Term4). Interestingly, two of the subjects carried co-occurring *G. vaginalis* strains (Figs. 1A and 4A; subjects Term4 and Pre2). The strains shared >99% average pairwise nucleotide identity in the 16S rRNA gene, yet single nucleotide polymorphism (SNP) patterns were evident in this gene (Supplemental Fig. S7A). One strain was generally more abundant than the other throughout pregnancy: in subject Term4, both *G. vaginalis* strains were found at low relative abundance (less than 7% for each strain in any sample) (Fig. 4A); while in subject

Pre2, the two strains co-existed at roughly equal abundances early in pregnancy and then one assumed dominance as gestation progressed (Fig. 4A).

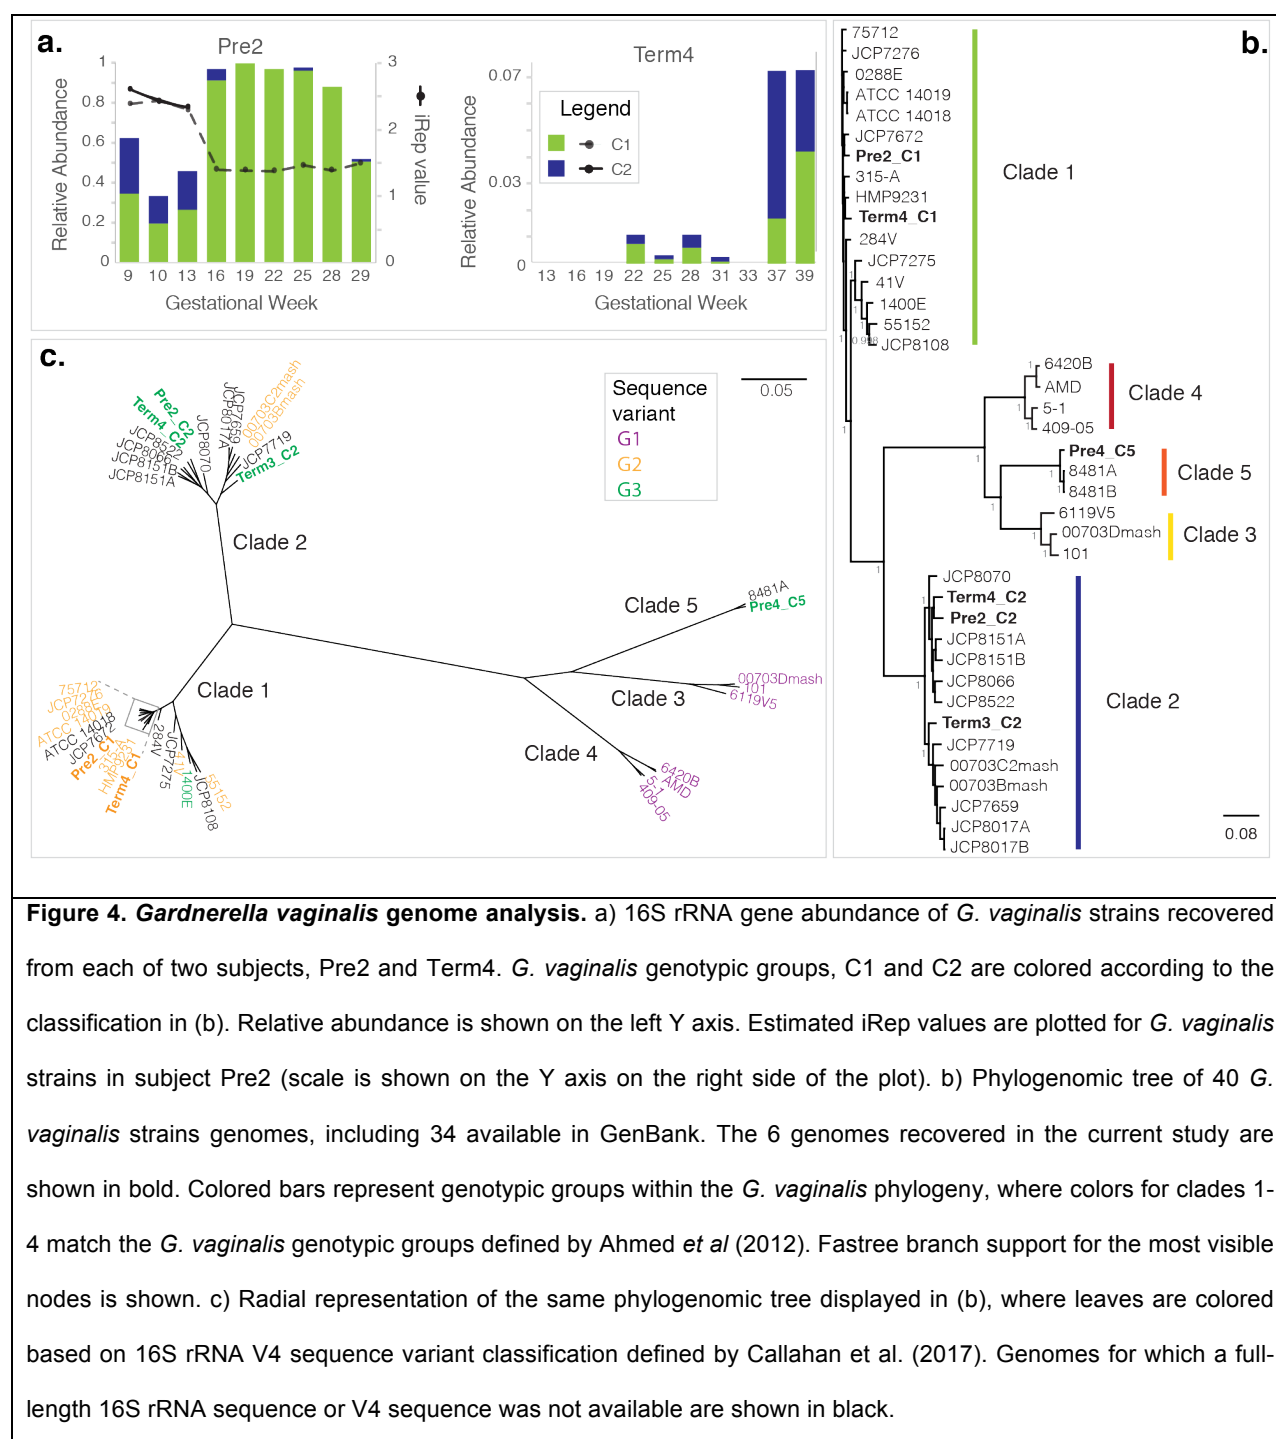

To determine whether replication may have been associated with the relative abundance differences in *G. vaginalis* strains within each subject, iRep values were determined. iRep

values have been employed to infer replication rates of microbial genome types from draft quality genomes reconstructed from metagenomic data and can be used to suggest that a particular microbial type is actively growing at the time of sampling (Brown et al. 2015). As described in (Brown et al. 2015), an iRep value of 2 would indicate that most of the population is replicating 1 copy of its chromosome. The iRep values for the co-occurring *G. vaginalis* strains in subject Pre2 indicate both strains were actively replicating at the beginning of pregnancy (iRep ~2.5) when both strains co-existed at relatively equal abundances. After gestational week 16, the Pre2\_C1 strain remained dominant with a stable replication rate value of ~1.5 (that is, roughly 50% of the population replicating), while the Pre2\_C2 strain dropped below iRep calculation limits due to low abundance (Fig. 4A).

A full-length multiple genome alignment and phylogenomic tree of the six genomes recovered in this study, and 34 complete and draft genomes available in GenBank revealed five divergent clades (Fig. 4B,C). The dominant genomes recovered from subjects Term4 and Pre2 (Term4\_C1, and Pre2\_C1) were more similar to those of a similar genome type found in other subjects than to the co-occurring genome within the same subject (Fig. 4B). Interestingly, when using the ATCC 14019 type strain genome as reference, the total number of SNPs across the genomes did not correlate with the group phylogeny. In other words, a divergent clade does not necessarily harbor more SNPs than strains within Clade 1 to which the ATCC 14019 strain belongs (SNP counts are displayed next to the genome ID in Supplemental Fig. S7B).

From over 50,600 genes predicted in all 40 strain genomes, ~4,000 genes were unique to a genome, and the rest could be clustered at >60% AAI over 70% alignment coverage into >3,300 orthologous groups. In total, 41,245 orthologous genes were present in at least half the genomes within each of the five clades described above (1763 orthologous groups) and ~44% of these represented the pangenome (cluster 4, Supplemental Fig. S8A). Furthermore, hierarchical clustering suggested groups of orthologous genes specific to each genome clade: genes shared within Clade 1 genomes (cluster 6), genes in Clade 2 genomes (cluster 13), genes in Clade 3 genomes (cluster 1), genes in Clade 4 genomes (cluster 3), genes in Clade 5

genomes (cluster 5), and one cluster composed of genes shared between Clade 3, Clade 4, and Clade 5 genomes (Supplemental Fig. S8A). A survey of the functional categories represented within these clusters indicated that, although there is redundancy of functions across all clusters (most of them also represented in the pangenome cluster), some functions are enriched in clade-specific genomes. For example, hypothetical proteins are enriched in Clade 5 genomes; proteins involved in vitamin and cofactor metabolism, and CRISPR Cas genes are enriched in Clade 3 genomes; and membrane proteins, DNA recombination/repair proteins, and proteins with transferase activity appear enriched in Clade 2 genomes. The results suggest a clade-specific enrichment of functional categories in *G. vaginalis* genomes.

A recent detailed survey of SNP patterns in the V4 region of the 16S rRNA gene from a longitudinal study of vaginal communities from pregnant women classified *G. vaginalis* strains into amplicon sequence variants (ASVs), and the three most frequent sequence variants could be mapped onto divergent clades on a phylogenomic tree (Callahan et al. 2017). The genomes and full-length 16S rRNA gene of two of the described ASVs were recovered in this study: variant G2 (Term4\_C1 and Pre2\_C1) (tree leaves colored in orange, Fig. 4C); and variant G3 (Term3\_C2, Term4\_C2, and Pre4\_C5), which intermingle across the phylogenomic tree (tree leaves colored in green, Fig. 4C).

### *Lactobacillus* genomes vary in their mobile elements

Vaginal bacterial communities of many women are dominated by *Lactobacillus iners* (Ravel et al. 2011; DiGiulio et al. 2015), an organism that has been associated with both health and disease (Macklaim et al. 2011). Recent studies have shown that *L. iners* is associated with high diversity CSTs while *L. crispatus* (dominant species in CST I) is thought to be more protective against disease (Callahan et al. 2017; Smith and Ravel 2017). We recovered 6 near complete *L. iners* genomes, as well as 4 fragmented *L. crispatus* genomes (completeness was assessed based on single copy genes and average genome size).



A comparison of the *L. iners* genomes with the KEGG Automatic Annotation Server (Moriya et al. 2007) revealed no major differences in terms of the presence and absence of genes of known function. Alignment of the consensus *L. iners* genome sequences from five of the six strains to the NCBI reference strain DSM 13335 using Mauve showed that the genomes share high levels of synteny (the genome from Pre4 was not used due to its high fragmentation) (see Methods; Fig. 5A). The main differences between the strains were the variable presence of mobile element-like genes, including classic phage and plasmid genes (such as phage integrases, phage lysins, phage portal genes, as well as genes putatively involved in restriction-modification systems, toxin-antitoxin systems, and antibiotic transport), and many hypothetical genes (Fig. 5A, islands). Analysis of orthologous gene groups among the six genomes assembled here and 18 other publicly available genomes confirmed that *L. iners* genomes are highly conserved, sharing 90.5% of their genes (Supplemental Fig. S9).

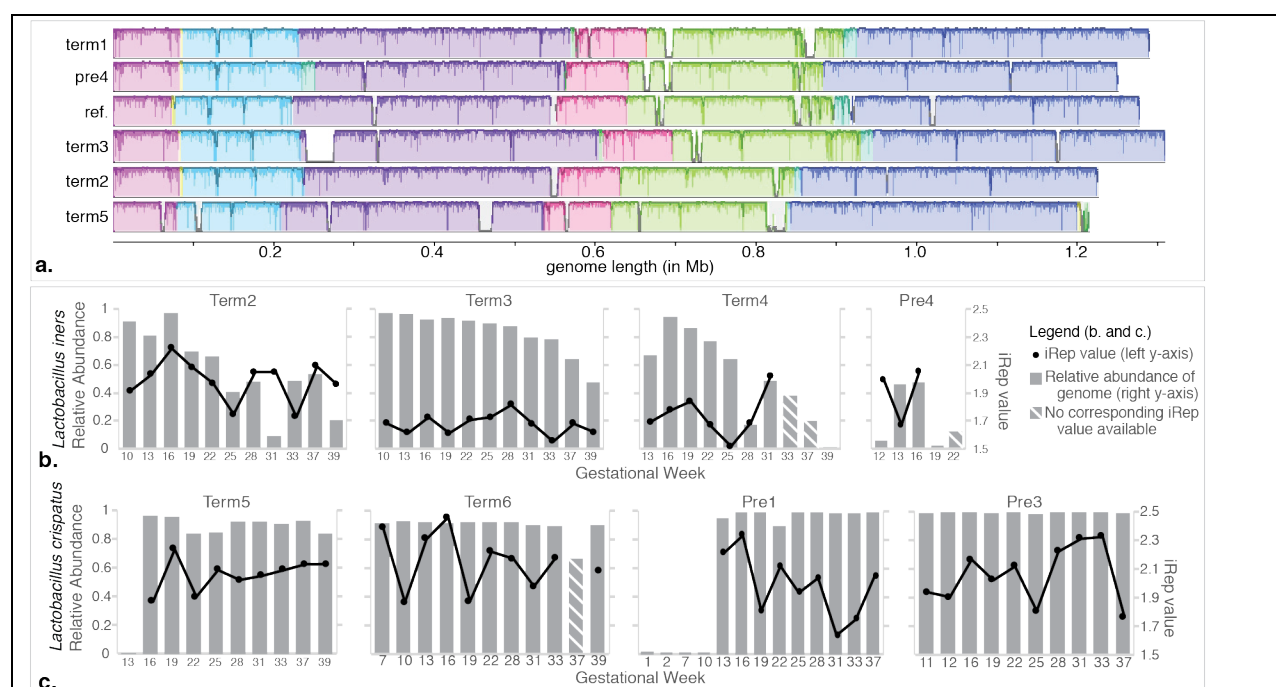

**Figure 5. Comparative genomics of *Lactobacillus* sp. and estimated replication rates.**

**a)** Multiple genome alignment of 5 *L. iners* genomes recovered through metagenomics along with the reference strain DSM 13335 (see Methods). A modified alignment created in Mauve shows the shared genomic context, as well as genomic islands unique to a strain (white areas within a conserved block). **b) and c)** Relative abundance and estimated genome replication values (iRep) for *L. iners* and for *L. crispatus*, respectively.



The community composition of *L. crispatus*-dominated communities remained generally stable through pregnancy and tended to have low richness (Fig. 1). A full genome alignment and analysis of orthologous genes of 41 draft genomes of *L. crispatus*, including six  
5 reconstructed in this study, grouped 80,484 genes into 4,705 orthologous groups present in at least 2 genomes. Hierarchical clustering of the presence/absence of orthologous groups suggested two divergent clusters with more than half of the genes representing the core genome (Supplemental Fig. S10). The two *L. crispatus* types differed in the presence of core SNPs (SNPs present in all genomes) as well as in the presence of cluster-specific orthologous  
10 groups. A previous comparative genomics analysis of 10 *L. crispatus* genomes identified ~1,200 core genes, as well as genome-specific genes encoding up to 40% genes of unknown function (Ojala et al. 2014). Characterization of the *L. crispatus* group-specific genes might improve our understanding of this species' ecology in human urogenital health.

iRep values were estimated for *L. iners* in subjects Term2, Term3, Term4, and Pre4, and  
15 for *L. crispatus* in subjects Term5, Term6, Pre1, and Pre3 to determine whether the different *Lactobacillus* genomes were replicating (see Methods). iRep values fluctuated around 2 (most members of the population were replicating 1 copy of their chromosome) for both organisms and appeared independent of relative abundance (Fig. 5B). On average, *L. crispatus* had a slightly higher iRep value (2.0) than did *L. iners* (1.8) (~100% of the *L. crispatus* population, and  
20 80% of the *L. iners* population replicating 1 copy of their genome) (Fig. 5B).

### *CRISPR-Cas diversity and CRISPR spacer targets*

In order to investigate the phage and plasmid populations at the different body sites over the course of pregnancy, we characterized the types and distribution of the CRISPR-Cas  
25 systems in the vaginal, gut, and saliva assemblies (Fig. 6A). Based on the study from (Makarova et al. 2015), there are five known CRISPR-Cas type systems defined by the composition and genomic architecture of Cas genes, four of which were identified in our

metagenomics data. New CRISPR-Cas systems have been reported since 2015, such as those from uncultivated microbes (Burstein et al. 2017). For the purposes of our study, we used the CRISPR-Cas system classification derived from (Makarova et al. 2015). Type I was the dominant CRISPR-Cas system in gut samples, whereas Type II was the dominant system in saliva samples (Fig. 6A). Type I is thought to be the most common CRISPR system type (Makarova et al. 2015).

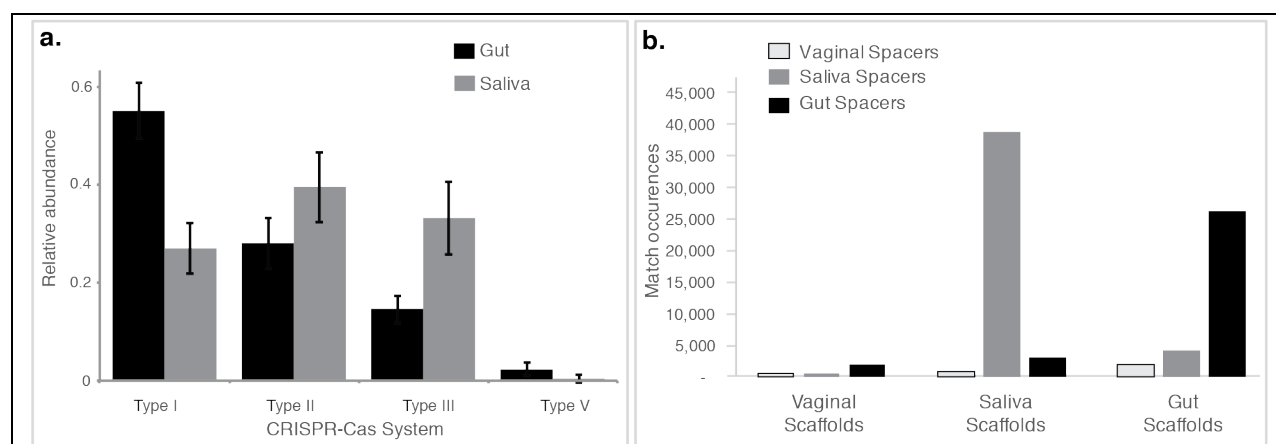

**Figure 6. Diversity and distribution of CRISPR-Cas systems and CRISPR spacer targets (mobile elements).**

**a)** Distribution of CRISPR-Cas system types in the gut (gray) and saliva (black) samples in this study (I, II, III, V). Vaginal samples are not shown due to low bacterial diversity. The black lines indicate standard deviation. **b)** Frequency of matches between spacers and scaffolds. This graph shows the total number of matches by body site (outlined grey, vaginal spacers; light gray, saliva spacers; and dark grey, gut spacers). There were a total of 78,054 matches between spacers and all pregnancy scaffolds. Overall, we detected 3,254 spacer types from vaginal samples, 36,477 spacer types from gut samples, and 36,279 spacer types from saliva samples.

In total, there were 137, 618, and 1255 ‘repeat types’ among vaginal, saliva, and gut samples, respectively (Fig. 6B, Supplementary Table S2). Each repeat type represents a repeat sequence found in a CRISPR locus; different CRISPR loci (within or between organisms) can share the same repeat type. Many more spacer types were found in the gut (36,477) and saliva (36,279) samples, than in the vaginal samples (3,254). Although there were twice as many repeat types in the gut than in saliva, the similar total number of spacers in the samples from each site suggested there were either longer CRISPR loci in organisms (on average) in saliva or there were more CRISPR loci that shared the same repeat type among organisms in saliva.

We used the CRISPR spacers to detect matches in the NCBI database of viral genomes as well as across the data generated in this study. We found significantly more matches (and sequence similarity) to the data generated from our samples than to the NCBI virus database (Supplemental Fig. S11A). Within the metagenomic data, there were 78,054 total matches between spacers and scaffolds (Fig. 6B). On average, ~32% of the spacers had at least one match to a scaffold one of the body sites (vaginal: 31%; saliva: 38%; gut: 28%). Gut and saliva spacers had the most matches to scaffolds from the same body site. However, vaginal spacers had more matches to the gut scaffolds, both in terms of total matches between spacers and scaffolds (Fig. 6B) as well as in terms of the number of spacers with at least one match (Supplemental Fig. S11B). This was also true when vaginal spacers were viewed between and within individuals (Supplementary Table S3). It is possible that sequencing depth may have resulted in under-sampling of vaginal scaffold matches or that there were more scaffolds from the gut that serve as potential targets for vaginal spacers due to the higher diversity in the gut.

### Typical vaginal taxa are detected in the gut

While common gut *Lactobacillus* species such as *L. acidophilus*, *L. rhamnosus*, and *L. lactis* (Human Microbiome Project 2012) were identified in the metagenomic sequences assembled from gut communities, species typically seen in vaginal communities were found in 7 of the 10 subjects studied here. Near-complete genomes and shorter genomic fragments (3.5 - 180 kb binned) of *L. iners* (in Term2, Term4, and Pre4), *L. crispatus* (in Term5, Term6 and Pre1), and *G. vaginalis* (in Pre2 and Pre4) were recovered from gut samples.

In all cases, the typical vaginal taxon found in the gut (at very low abundance) was the dominant bacterial species in the corresponding vaginal community of the same subject. Furthermore, genomic fragments from both *L. iners* and *G. vaginalis*, which were assembled from only one vaginal sample in subject Pre4 (Fig. 1) were detected in that subject's gut. Sharing of *L. iners*, *L. crispatus*, and *G. vaginalis* between the vagina and gut was supported by an assessment of the presence of these vaginal bacteria in gut samples from the larger

Stanford cohort. Of 41 subjects who provided both vaginal and gut samples (both stool and rectal swabs) (DiGiulio et al. 2015), 34 had 16S rRNA gene sequences of typical vaginal bacteria in their gut samples, and 33 had sequences from as many as 5 of their own vaginal species present in at least one of their gut samples (Supplementary Table S4). Evaluation of whole-genome core SNPs and clusters of orthologous genes in *L. iners* and *L. crispatus* reconstructed genome sequences indicated that the vaginal and gut sequences recovered within the same subject were more closely related to each other than to genome sequences assembled or identified in other subjects, suggesting that strains of vaginal *Lactobacillus* species from within the same subject come from the same ancestor (Supplemental Fig. S10A; Supplemental Fig. S11A).

The vaginal and gut genomes recovered here likely came from different populations, as evidenced by the amount of variation observed in full-genome and genomic fragment alignments within subjects, and the average pairwise nucleotide identity between the co-assembled genomes (Supplemental Fig. S12). Furthermore, SNPs within the vaginal read data mapping to the co-assembled genomes of *L. iners* and *L. crispatus* from the vagina indicated strain variation (*L. iners* and *L. crispatus* were deeply sequenced to a median of 219x coverage, with a range between 17x and 1180x). However, the frequency of SNPs unique to the gut read data that mapped to the corresponding vaginal strain genome from the same subject indicates that the pool of sequences used to assemble each of the genomes in the vagina and gut were not the same (Table 2, number of SNPs deemed significant based on the probability that a SNP is a product of random variation or sequencing error). For example, 1% of the SNPs that mapped to the vaginal *L. iners* genome from subject Term4 were unique to that subject's gut read data (>400 SNPs distributed across the genome). Given that *L. iners* was assembled from the vagina of subject Term4 at 168x coverage, we would expect to recover almost all SNPs present in the gut read data (which achieved 7x coverage) if the sequences came from the same source.

| Organism                      | Vagina             |          |          | Gut                |          |          |               |
|-------------------------------|--------------------|----------|----------|--------------------|----------|----------|---------------|
|                               | Relative abundance | Coverage | No. SNPs | Relative abundance | Coverage | No. SNPs | % unique SNPs |
| Term 2<br><i>L. iners</i>     | 0.4615             | 139X     | 647      | 0.0011             | 14X      | 840      | 0.95          |
| Term 4<br><i>L. iners</i>     | 0.4406             | 168X     | 15342    | 0.0013             | 7X       | 4140     | 0.01          |
| Term 5<br><i>L. crispatus</i> | 0.7764             | 278X     | 3720     | 0.0022             | 8X       | 1938     | 0.97          |
| Term 6<br><i>L. crispatus</i> | 1                  | 312X     | 2675     | 0.0053             | 30X      | 333      | 0.05          |

**Table 2. SNP analysis of the read data from vaginal and gut samples that mapped to the near-complete genomes of *L. iners* and *L. crispatus* recovered from the vagina.** Sequencing reads from the vagina and gut of subjects Term2, Term4, Term5, and Term6 were mapped to the assembled genome of the dominant vaginal species for that same subject, and the occurrence of significant SNPs in the read data was determined using VarScan. The average relative abundance of each genome in the vagina and gut was estimated from the relative abundance of 16 single-copy ribosomal protein sequences, averaged across all samples sequenced from an individual subject. The percent SNPs unique to the gut genome was determined by comparing each SNP within a subject and filtering out significant SNPs that occurred at both body sites.

## DISCUSSION

The human vagina, oral cavity, and gut in combination with the microbial organisms, their genomes and functions within these body sites (microbiomes) reveal mutualistic relationships in which the host provides nutrients and a specialized niche, and the microbiota provides protection against pathogens and beneficial signals to the immune system, among other benefits (Fujimura et al. 2010; Ma et al. 2012). Here, we used whole community shotgun sequencing of human microbiome samples from three body sites (vagina, oral cavity, and gut) to characterize metagenome composition patterns over the course of pregnancy. High inter-individual variability and dynamic community composition across gestational age were observed at all body sites.

In the vagina, a direct relationship between gestational age and increasing taxonomic richness was observed in *L. iners*-dominated communities. This finding was also evident from

re-evaluating the 16S rRNA gene amplicon data from the previously studied Stanford and UAB cohorts (DiGiulio et al. 2015; Callahan et al. 2017). Although vaginal communities from subjects with *L. crispatus*-dominated communities in the Stanford cohort, and from subjects with abundant *Shuttleworthia* in the UAB cohort also showed statistically significant increases in taxonomic richness with gestational age, the association might be spurious due to the low number of samples with high richness values in *L. crispatus*-dominated communities, and low sample size in *Shuttleworthia*-dominated communities. *L. iners* is thought to be less competitive with *Gardnerella vaginalis*, and thus, to permit more frequent transitions to a high diversity community type (Ravel et al. 2011; Brooks et al. 2016; Callahan et al. 2017). Our data lend further support to the distinct ecology and less protective properties of this particular *Lactobacillus* species.

Analyses of community gene content indicated that while individual was the strongest source of sample-to-sample variation, a significant gestational age (time) effect was observed for most subjects at all body sites. In addition, the dominant taxon (in vaginal communities) and adverse pregnancy outcome, e.g., preeclampsia (in gut and saliva communities) also appeared to be important factors. For example, samples from one subject (Pre4) who delivered very early in pregnancy clustered separately from uncomplicated pregnancies. The small number of subjects in this study and the even smaller number with adverse pregnancy outcomes render any effort at this point to infer biological significance to this association problematic. Analyses of larger numbers of subjects with and without these adverse outcomes will be needed for identification of biological leads.

The genomes of six strains of *Gardnerella vaginalis* were reconstructed and analyzed. Although *G. vaginalis* has been associated with bacterial vaginosis and with increased risk of preterm birth (Schwebke et al. 2014; DiGiulio et al. 2015; Callahan et al. 2017), it is also commonly found in vaginal CST IV communities of healthy women (Romero et al. 2014). *G. vaginalis* “genotypes” have been proposed previously: four main types were identified based on ~473 concatenated core-gene alignments (Ahmed et al. 2012); three groups were suggested

based on conserved chaperonin *cpn60* genes (Schellenberg et al. 2016); four genotypes were proposed with molecular genotyping (Santiago et al. 2011); and four clades were suggested from phylogenies reconstructed from core-gene sets (Malki et al. 2016). Phylogenomic trees reconstructed from full-genome alignments, as well as from core SNPs, based on 34 publicly available genomes along with the genomes recovered here suggested a fifth divergent clade within the *G. vaginalis* tree (Fig. 4B and Supplemental Fig. S7). We identified groups of genes enriched in specific functions within each clade. None of the publicly available genome sequences were generated from isolates from pregnant subjects: some came from asymptomatic healthy women, while other “pathogenic” strains were isolated from subjects with bacterial vaginosis (BV) (Yeoman et al. 2010). However, healthy vs. “pathogenic” strains did not map to specific clades. Consistent with previous comparative genomics reports of *G. vaginalis* (Ahmed et al. 2012; Malki et al. 2016), the *G. vaginalis* genomes recovered here show high degrees of re-arrangements with many unique islands. Although multiple *G. vaginalis* strains were isolated from the same subject previously (Ahmed et al. 2012), the co-occurring genomes were not compared, and the importance of co-occurring strains was not addressed. The results presented here suggest specialized functions encoded by closely related *G. vaginalis* strains and the possibility that different strains play different roles in health and disease.

CRISPR-Cas systems are intrinsically related to the mobile elements (such as phage and plasmid populations) that have targeted the genomic host in which they reside. Thus, CRISPR spacers allow an indirect assessment of the mobile element pool in the sampled habitat. The relative number of spacer matches in gut and saliva samples from this study indicate that phage populations are better adapted to their local environments than to environments found in other individuals. Previous findings have shown that samples from the same individual provide the highest number of matches for spacers from that same individual (Pride et al. 2011; Rho et al. 2012; Robles-Sikisaka et al. 2013; Abeles et al. 2014). However, we detected phage populations that are common enough between body sites and subjects to be

targeted by the same CRISPR spacers, suggesting that similar mobile elements have been encountered by the microbial communities at different body sites and by different individuals.

*Lactobacillus crispatus*, *Lactobacillus iners*, and *Gardnerella vaginalis* are thought to be specific to the vagina, while other *Lactobacillus* species, such as *L. acidophilus*, *L. rhamnosus*, and *L. lactis* are typical in the gut (Human Microbiome Project 2012). Near-complete genomes and genomic fragments of *L. iners*, *L. crispatus*, and *G. vaginalis* were recovered from gut samples in this study, and the *Lactobacillus* species found in the gut of a specific subject was the dominant species found in the vagina of the same subject. Genome reconstruction of identical strains from samples of different body sites in the same subject has been reported previously based on metagenomic data from infants (Olm et al. 2017). One explanation for the finding of the same species in vaginal and gut samples of the same subject is contamination during the self-sampling procedure (likely when rectal swabs were provided in lieu of stool samples) or contamination during library preparation. However, given that the concurrent vaginal species occurred at high frequencies in both stool and rectal swab samples, and given the variation observed in the reconstructed genomes (from re-arrangements and genomic islands) and in the SNP patterns, we believe that the strains are not identical and are, therefore, likely not due to contamination. Colonization of the vagina and gut body sites is unlikely to occur independently (the same vaginal species was always found in the woman's gut, with only one exception in the Stanford cohort). Colonization may occur from the mother at birth (especially if the subjects were delivered vaginally) or colonization from self at an earlier time point. Although there are no previous reports, to our knowledge, about shared bacterial species in the vagina and gut of the same individual, the phenomenon is unlikely to be limited to pregnant women. Examination of taxa reported in the HMP (Human Microbiome Project 2012) indicated the presence of *L. iners* and *Gardnerella* in gut samples from a few female subjects but in none of the male subjects. The paucity of evidence of *L. iners*, *L. crispatus*, and *G. vaginalis* in gut samples in the HMP study may be due to the difficulty in classifying short amplicon sequences



at the species level, in addition to the shallow sequencing achieved in the HMP (Human Microbiome Project 2012).

The results reported here suggest dynamic behavior in the microbiome during pregnancy and highlight the importance of genome-resolved strain analyses to further our understanding of the establishment and evolution of the human microbiome.

## METHODS

### *Sample Selection*

A subset of subjects from the cohort examined with 16S rRNA gene amplicon analysis in (DiGiulio et al. 2015) were selected for this study. The subject ID used in this paper corresponded to those used in the prior study: Term1 = 10039, Term2 = 10044, Term3 = 10034, Term4 = 10032, Term5 = 10047, Term6 = 10046, Pre1 = 10101; Pre2 = 10031; Pre3 = 10036; Pre4 = 10029 (DiGiulio et al. 2015). Data about these subjects are available in Supplementary Table 1. Briefly, six of these subjects (Term1-6) gave birth at term (after 37 weeks) while four of these subjects (Pre1-4) gave birth prematurely (before 37 weeks). Two of the term pregnancies were complicated by preeclampsia, one by oligohydramnios, and one by type 2 diabetes. One of the preterm pregnancies was complicated by preeclampsia. Subjects and samples were selected based on the following criteria: 1) subjects with samples collected roughly every third gestational week and on the same weeks across all subjects, to enable cross-subject comparisons; and 2) subjects with the highest compliance with sample collection at all three body sites. A total of 292 samples (101 vaginal swabs, 101 saliva, and 90 stool or rectal swabs) were selected for shotgun metagenomic analysis.

### *DNA sample preparation and whole community metagenomic sequencing*

DNA extraction methods have been reported previously (DiGiulio et al. 2015). DNA from each of the 292 samples was sheared to an average length of 400-500 bp. Barcoded TruSeq

libraries were sequenced across 20 lanes of an Illumina HiSeq 2500 (150 bp x 2 mode) at the High-Throughput Sequencing and Genotyping Unit at the University of Illinois Roy J. Carver Biotechnology Center.

## 5 *Sequence processing and assembly*

More than 7 billion paired-end reads were obtained, for a total of 1.08 Tbp (Table 1). Briefly, low quality bases were trimmed using the Sickle trimmer script with default parameters (<https://github.com/najoshi/sickle>). Adapter sequences were removed with SeqPrep (<https://github.com/jstjohn/SeqPrep>) and sequences >100 bp were retained.

10 The Burrows-Wheeler Alignment (BWA) tool (Li and Durbin 2009) was used to map all trimmed reads to human genome version GRCh37, and human reads were filtered out. Remaining reads were co-assembled across all time points per subject, per body site. Assemblies were created with IDBA\_UD (Peng et al. 2012) using default parameters. Scaffolds from vaginal samples were binned based on %GC and coverage using the public  
15 knowledgebase, ggKbase (<http://ggkbase.berkeley.edu>), as well as time-series information using ESOM (Dick et al. 2009). Genes were predicted with Prodigal (Hyatt et al. 2010), tRNAs with tRNA-scan (Lowe and Eddy 1997), and functional annotations were assigned from BLAST searches against the KEGG (Kanehisa and Goto 2000) and UniRef100 (Magrane and Consortium 2011) databases.

20 Full length 16S rRNA gene sequences were reconstructed per body site with EMIRGE (Miller et al. 2011), using the SILVA database SSURef 111 (Pruesse et al. 2007) and run with 100 iterations. Sequences that were identified as chimeras with any two of the three chimera check software packages, UCHIME (Edgar et al. 2011), DECIPHER (Wright et al. 2012), and Bellerophon (Huber et al. 2004), were removed.

25

*Calculations of relative abundances of genes and genome bins*

The relative abundance was calculated for all genome bins from vaginal assemblies for each time point sampled. Using bowtie2 with default parameters (Langmead 2010), sequencing reads from each time point were mapped to the co-assembled scaffolds from each subject. Vaginal genome bin abundance was calculated based on the numbers of reads that mapped to all co-assembled scaffolds within a bin, relative to the total number of reads that mapped to scaffolds from all bins within a subject. The final values were then taken as proportions (stacked 100%). Note that reads that did not map to any of the scaffolds or that mapped to scaffolds from unknown genome bins were not used in the calculations.

16 single-copy ribosomal protein (RP) gene sets were used to estimate bacterial diversity within body sites, as previously described (Hug et al. 2016). In total, 22,737 ribosomal proteins annotated as L14b/L23e, L15, L16/L10E, L18P/L5E, L2 rplB, L22, L24, L3, L4/L1e, L5, L6, S10, S17, S19, S3, and S8 were identified in 4,650 scaffolds from all body sites. Individual RP gene sets were clustered at 99% average amino acid identity (AAI) with usearch64 (Edgar 2010), and scaffolds containing the same sets of clustered RPs were considered to be derived from the same taxon (accounting for a total of 4,024 taxa). For example, when 4 RPs encoded in one scaffold belonged to the same RP cluster encoded in a different, longer scaffold, the two scaffolds were labeled as associated with the same taxon, and the longer scaffold was taken as the reference. Therefore, each taxon was represented by between 1 and 16 RPs.

Scaffold coverage (number of reads per scaffold divided by the scaffold length) was used to estimate read counts for predicted genes, by multiplying coverage by the predicted gene length. RP abundance tables (taxa abundance tables) were obtained by taking the average gene read counts within scaffolds (between 1 and 16 genes in a scaffold), and summed over the RP clusters described above. In addition, gene abundance tables were used to generate UniRef90 gene family abundance tables by summing the estimated gene read counts over each UniRef90 family. NMDS ordination (which seeks all underlying variation in a dataset (Jari Oksanen et al. 2017)) was performed on Bray-Curtis distance matrices of variance-stabilizing transformed UniRef90 gene family abundance tables using the DESeq2 (Love et al.

2014) and phyloseq (McMurdie and Holmes 2013) packages in R. In addition, and assuming that prior knowledge indicates doing so is sensible, RDA ordination can be used to test specific factors (or ‘constraints’) as sources of variation (Jari Oksanen et al. 2017). RDA was performed directly on variance-stabilizing transformed UniRef90 gene family abundance tables using the same packages used for NMDS. The 16S rRNA gene tables, UniRef90 gene family tables, RP tables, pathway abundance tables, and R code used to generate Fig. 2, Fig. 3, Supplemental Fig. S1, Supplemental Fig. S3, Supplemental Fig. S4, Supplemental Fig. S5, Supplemental Fig. S6, and Supplemental Fig. S8 are available as Supplemental Materials (.rmd files contain the code, .RData files contain data tables).

#### *Functional pathway presence and abundance analysis.*

Functional pathways were predicted with HUMAnN2 (Abubucker et al. 2012) using the read fastq files. The output, a table of the presence and abundance (adjusted read counts) of functional pathways, was used to estimate potential trends with gestational age and with degree of diversity. Pathway abundance tables were variance-stabilized with DESeq2 in R and are available in .RData files in the Supplemental Materials.

#### *G. vaginalis, L. iners, and L. crispatus phylogenetic trees and genome comparisons*

Full-length 16S rRNA gene sequences from the six *G. vaginalis* strain genomes recovered via metagenomics, and those from 22 publicly available genomes were aligned with Muscle (Edgar 2004) and visualized with Geneious (Kearse et al. 2012) to generate Supplemental Fig. S7. Given that closed *G. vaginalis* genomes encode two identical copies of the 16S rRNA gene (Yeoman et al. 2010), 16S rRNA fragment sequences in four of the public genomes (strains 284V, JCP8108, JCP7672, and JCP7276) were joined with gaps.

The publicly available genomes of 34 *G. vaginalis* strains, plus the six strains recovered in this study were used to build the tree as shown in Fig. 4. The multiple genome alignments

were obtained with progressiveMauve (Darling et al. 2010). Briefly, progressiveMauve finds initial local alignments and uses them as seeds, which are then progressively extended to global alignments (the pangenome) using a guide tree. The output of progressiveMauve, a specially formatted, extended multi-fasta file (.xmfa format), was visualized and exported in standard xmfa format using Gingr (Treangen et al. 2014), and converted to fasta format using a publicly available perl script ([https://github.com/kjolley/seq\\_scripts/blob/master/xmfa2fasta.pl](https://github.com/kjolley/seq_scripts/blob/master/xmfa2fasta.pl)). The multiple genome alignment in fasta format was used to construct the phylogenetic trees using FastTree (Price et al. 2009) version 2.1.8 with parameters `-nt -gtr -gamma`. The trees in Newick format were visualized and exported using Geneious (Kearse et al. 2012).

Orthologous gene groups between *G. vaginalis* genomes were exported from the Mauve alignment based on at least 60% identity over 70% alignment coverage. Presence or absence of genes unique to each strain was not evaluated because only three of the 34 *Gardnerella* genomes were closed, making inferences about the presence/absence of genes difficult. 41,245 orthologous genes were present in at least half of the genomes within each of the five clades depicted in Fig. 4 (in total 1763 orthologous groups). Hierarchical clustering on the Jaccard distances of the presence/absence of these 1763 orthologous groups was performed with the *vegan* (Jari Oksanen et al. 2017) and *pheatmap* (Kolde 2015) packages in R. The relative contribution of genes in functional categories was estimated from the number of genes in each functional category divided by the total number of orthologous genes in each cluster. The 1763 orthologous groups could be classified into 212 functional categories represented in the Gene Ontology Database, as well as grouped into functional categories based on their gene annotation.

Accession numbers for *Gardnerella vaginalis* genomes used in this study are SAMN02436832, SAMN02472074, SAMN02472073, SAMN02393773, SAMN02393775, SAMN00138210, SAMN02393781, SAMN02393782, SAMN02393783, SAMN02393779, SAMN02393784, SAMN02393777, SAMN02393778, SAMN02393774, SAMN02472072,

SAMN02471014, SAMN02436904, SAMN02436712, SAMN02436831, SAMN02436711, SAMN02436912, SAMN02436773, SAMN02436710, SAMN02436911, SAMN02436830, SAMN02436772, SAMN02436771, SAMN02436910, SAMN02436829, SAMN02436909, SAMN02472071, CP001849, CP002104, and CP002725.

5 Six *L. iners* genomes assembled from vaginal samples in this study were used to assess syntenicity in Fig. 5. All strains were aligned as above, with *L. iners* DSM 13335 (the NCBI representative genome) as a reference. 16 publicly available *L. iners* strains as well as all 8 *L. iners* genomes assembled from this study were used for whole-genome SNPs and orthologous genes analyses in Supplemental Fig. S10. The NCBI assembly numbers for the publicly  
10 available *L. iners* genomes used in this study are: GCA\_000160875.1, GCA\_000185405.1, GCA\_000149065.2, GCA\_000149085.2, GCA\_000149105.2, GCA\_000149125.2, GCA\_000149145.2, GCA\_000177755.1, GCA\_000179935.1, GCA\_000179955.1, GCA\_000179975.1, GCA\_000179995.1, GCA\_000191685.2, GCA\_000191705.2, GCA\_000204435.2, and GCA\_001435015.1.

15 52 publicly available *L. crispatus* genomes as well as 6 *L. crispatus* genomes reconstructed from this study were used for whole-genome SNPs and orthologous genes analyses in Supplemental Fig. S11. All strains were aligned with same methods as above, with *L. crispatus* ST1 (the NCBI representative genome) used as a reference. The NCBI assembly numbers for the publically available *L. crispatus* genomes used in this study are:  
20 GCA\_000091765.1, GCA\_000160515.1, GCA\_000161915.2, GCA\_000162255.1, GCA\_000162315.1, GCA\_000176975.2, GCA\_000301115.1, GCA\_000301135.1, GCA\_001434005.1, GCA\_001563615.1, GCA\_000177575.1, GCA\_000497065.1, GCA\_001541385.1, GCA\_001541405.1, GCA\_001541505.1, GCA\_001541535.1, GCA\_001541585.1, GCA\_001567095.1, GCA\_001704465.1, GCA\_002218565.1,  
25 GCA\_002218655.1, GCA\_002218735.1, GCA\_002218765.1, GCA\_002218775.1, GCA\_002218805.1, GCA\_001541515.1, GCA\_001546015.1, GCA\_001546025.1,

GCA\_001700475.1, GCA\_002088015.1, GCA\_002218615.1, GCA\_002218645.1,  
 GCA\_002218685.1, GCA\_002218695.1, GCA\_002218815.1, GCA\_002218845.1,  
 GCA\_002218855.1, GCA\_002218885.1, GCA\_002218895.1, GCA\_002218925.1,  
 GCA\_002218945.1, GCA\_002218965.1, GCA\_002218975.1, GCA\_002219005.1,  
 5 GCA\_002219015.1, GCA\_002219045.1, GCA\_002219055.1, GCA\_002219085.1,  
 GCA\_000165885.1, GCA\_000466885.2, GCA\_001311685.1, and GCA\_001700485.1.

kSNP3 (Gardner et al. 2015) was used to build phylogenetic trees from whole-genome SNP patterns in Supplemental Figs. S7B, S9A, and S10A.

In order to determine if the *L. iners* and *L. crispatus* genomes from the gut and vagina  
 10 were similar, we evaluated the single nucleotide polymorphisms (SNPs) between the two  
 population genomes. First, we used `bowtie2` to identify reads from the gut dataset that  
 mapped to the genome of the corresponding *Lactobacillus* species assembled from the gut. We  
 then used `bowtie2` to map those subset of reads against the vaginal population genome.  
 Reads from the vaginal samples were also mapped to the corresponding *Lactobacillus* species  
 15 assembled from the vagina. Following the `bowtie2` mapping, we used `samtools` to convert  
 the SAM files to BAM files and sort the BAM files. We used `mpileup` (with `-B` and `-f`) in order  
 to create a pileup file for each BAM file. We used `varscan` (<http://varscan.sourceforge.net/>) to  
 identify the SNPs, with these changes in the default parameters: minimum coverage > 3 and p  
 value < 0.05.

## 20 Calculating iRep values

We used iRep (with default parameters) to estimate the replication rate of genomes  
 reconstructed from our vaginal metagenomic datasets as in Brown *et al.* (Brown et al. 2015).  
 Briefly, we screened the genomes of interest (*L. iners*, *L. crispatus*, and *G. vaginalis*) with  
 25 `checkM` (Parks et al. 2015) to ensure that the genomes complied with the recommended

genome completeness. For each genome, we obtained the vaginal reads from the same subject and mapped them to the consensus genome sequence separately per time point in order to generate a SAM file. Only genomes that passed quality control (completeness of the genome and coverage) were used.

5

### *Identification of CRISPR repeats/spacers, predicted Cas proteins, and CRISPR-Cas systems*

The program `crass` (Skenner et al. 2013), with default settings, was used to identify repeats and spacers from all reads from each sample across all sites. The resulting repeats and spacers were parsed from the `crass` output files using `crisprtools` (<http://ctskennerton.github.io/crisprtools/>).

10

In order to assess the identity and diversity of Cas proteins, we used HMMER3 (<http://hmmer.org/>) to search all predicted proteins against an HMM database, which included models for all the Cas genes from Makarova *et al.* (Makarova et al. 2015) and from Krupovic *et al.* (Krupovic et al. 2016). Custom scripts were used to parse the results and search for nearby predicted Cas proteins (Burstein et al. 2016). CRISPR-Cas system types were identified based on the presence of 2 predicted Cas proteins, one of which is required to be a key protein: Cas3 = type I, Cas9 = type II, Cas10 = type III, Csf1 = type IV, and Cpf1 = type V. CRISPR-Cas types were only calculated for gut and saliva samples, as the vaginal samples had low organismal diversity. Cas types that were incomplete were marked as unknown/unclassified.

15

### *Detection of potential phage and plasmid sequences and dynamics of spacer matching*

In order to gain perspective on the potential phage and plasmid sequences in our dataset, we used CRISPR spacers to detect and assess variability of mobile element sequences. We used site-specific analyses to examine how spacer matches are shared between sites and individual analyses to determine how spacer matches are shared between subjects.

20

25



For site-specific analysis, CRISPR repeats and spacers were extracted from the reads combined across all sites (vaginal reads, gut reads, and saliva reads). For individual analyses, CRISPR repeats and spacers were extracted from each subject and combined for each site (term1 vaginal reads, term 1 gut reads, term1 saliva reads, etc.). Prior to any sequence search of spacers against scaffolds, we removed any scaffolds that had any sequence similarity to any CRISPR repeat. Briefly, all repeats detected in the site specific analysis were used to screen scaffolds with CRISPR loci within them, using blastn (modified for short queries). We removed all scaffolds with at least one repeat match that was at least 85% identical across 85% of the repeat length. While we might have screened for identical matches, we chose to be more conservative in order to reduce the chances of false detection of potential phage and plasmid sequences. For both the site-specific and the individual analyses, a spacer was recorded as a match if the spacer matched at least 85% identity and 85% of the spacer length across a scaffold.

## DATA ACCESS

Assemblies, protein sequences, gbk files, gene and protein abundance tables, metadata, and R code are publicly available at the Stanford Digital Repository site at <https://purl.stanford.edu/vp282bh3698>. Trimmed, non-human reads have been submitted to the NCBI Sequence Read Archive (accession number pending).

## ACKNOWLEDGMENTS

We are grateful to study participants, as well as Cele Quaintance, Nick Scalfone, Ana Laborde, March of Dimes Prematurity Research Center study coordinators, and nursing staff in the obstetrical clinics and the labor and delivery unit of Lucille Packard Children's Hospital. We thank Alvaro Hernandez at the University of Illinois Roy J. Carver Biotechnology Center. We thank David Burstein for advice and scripts for Cas protein analysis, and Elizabeth Costello for

helpful conversations. This research was supported by the March of Dimes Prematurity Research Center at Stanford University School of Medicine, the Thomas C. and Joan M. Merigan Endowment at Stanford University (D.A.R.), and NIH 1K99HD090290 (D.A.G.).

## 5 DISCLOSURE DECLARATION

Authors declare no conflicts of interest.

## REFERENCES

- Aagaard K, Riehle K, Ma J, Segata N, Mistretta TA, Coarfa C, Raza S, Rosenbaum S, Van den Veyver I, Milosavljevic A et al. 2012. A metagenomic approach to characterization of the vaginal microbiome signature in pregnancy. *PloS one* **7**: e36466.
- Abeles SR, Robles-Sikisaka R, Ly M, Lum AG, Salzman J, Boehm TK, Pride DT. 2014. Human oral viruses are personal, persistent and gender-consistent. *The ISME journal* **8**: 1753-1767.
- 15 Abubucker S, Segata N, Goll J, Schubert AM, Izard J, Cantarel BL, Rodriguez-Mueller B, Zucker J, Thiagarajan M, Henrissat B et al. 2012. Metabolic reconstruction for metagenomic data and its application to the human microbiome. *PLoS Comput Biol* **8**: e1002358.
- Ahmed A, Earl J, Retchless A, Hillier SL, Rabe LK, Cherpes TL, Powell E, Janto B, Eutsey R, 20 Hiller NL et al. 2012. Comparative genomic analyses of 17 clinical isolates of *Gardnerella vaginalis* provide evidence of multiple genetically isolated clades consistent with subspeciation into genovars. *J Bacteriol* **194**: 3922-3937.
- Andersson AF, Banfield JF. 2008. Virus population dynamics and acquired virus resistance in natural microbial communities. *Science* **320**: 1047-1050.
- 25 Bolotin A, Quinquis B, Sorokin A, Ehrlich SD. 2005. Clustered regularly interspaced short palindrome repeats (CRISPRs) have spacers of extrachromosomal origin. *Microbiology* **151**: 2551-2561.

- Brooks JP, Buck GA, Chen G, Diao L, Edwards DJ, Fettweis JM, Huzurbazar S, Rakitin A, Satten GA, Smirnova E, Waks Z, Wright ML, Yanover C, Zhou YH. 2017. Changes in vaginal community state types reflect major shifts in the microbiome. *Microb Ecol Health Dis* **28**: 1303265.
- 5 Brown CT, Hug LA, Thomas BC, Sharon I, Castelle CJ, Singh A, Wilkins MJ, Wrighton KC, Williams KH, Banfield JF. 2015. Unusual biology across a group comprising more than 15% of domain Bacteria. *Nature* **523**: 208-211.
- Brussow H, Canchaya C, Hardt WD. 2004. Phages and the evolution of bacterial pathogens: from genomic rearrangements to lysogenic conversion. *Microbiol Mol Biol Rev* **68**: 560-10 602, table of contents.
- Burstein D, Sun CL, Brown CT, Sharon I, Anantharaman K, Probst AJ, Thomas BC, Banfield JF. 2016. Major bacterial lineages are essentially devoid of CRISPR-Cas viral defence systems. *Nature communications* **7**: 10613.
- Callahan BJ, DiGiulio DB, Goltsman DSA, Sun CL, Costello EK, Jeganathan P, Biggio JR, 15 Wong RJ, Druzin ML, Shaw GM et al. 2017. Replication and refinement of a vaginal microbial signature of preterm birth in two racially distinct cohorts of US women. *Proceedings of the National Academy of Sciences of the United States of America* **114**: 9966-9971.
- Canchaya C, Fournous G, Chibani-Chennoufi S, Dillmann ML, Brussow H. 2003. Phage as 20 agents of lateral gene transfer. *Curr Opin Microbiol* **6**: 417-424.
- Charbonneau MR, Blanton LV, DiGiulio DB, Relman DA, Lebrilla CB, Mills DA, Gordon JI. 2016. A microbial perspective of human developmental biology. *Nature* **535**: 48-55.
- Cho I, Blaser MJ. 2012. The human microbiome: at the interface of health and disease. *Nature reviews Genetics* **13**: 260-270.
- 25 Costello EK, Stagaman K, Dethlefsen L, Bohannan BJ, Relman DA. 2012. The application of ecological theory toward an understanding of the human microbiome. *Science* **336**: 1255-1262.

- Darling AE, Mau B, Perna NT. 2010. progressiveMauve: multiple genome alignment with gene gain, loss and rearrangement. *PloS one* **5**: e11147.
- Dick GJ, Andersson AF, Baker BJ, Simmons SL, Thomas BC, Yelton AP, Banfield JF. 2009. Community-wide analysis of microbial genome sequence signatures. *Genome Biol* **10**: R85.
- DiGiulio DB, Callahan BJ, McMurdie PJ, Costello EK, Lyell DJ, Robaczewska A, Sun CL, Goltsman DSA, Wong RJ, Shaw G et al. 2015. Temporal and Spatial Variation of the Human Microbiota During Pregnancy. *Proc Natl Acad Sci USA* **112**:11060-5.
- Edgar RC. 2004. MUSCLE: multiple sequence alignment with high accuracy and high throughput. *Nucleic Acids Res* **32**: 1792-1797.
- Edgar RC. 2010. Search and clustering orders of magnitude faster than BLAST. *Bioinformatics* **26**: 2460-2461.
- Edgar RC, Haas BJ, Clemente JC, Quince C, Knight R. 2011. UCHIME improves sensitivity and speed of chimera detection. *Bioinformatics* **27**: 2194-2200.
- Fuhrman JA. 1999. Marine viruses and their biogeochemical and ecological effects. *Nature* **399**: 541-548.
- Fujimura KE, Slusher NA, Cabana MD, Lynch SV. 2010. Role of the gut microbiota in defining human health. *Expert review of anti-infective therapy* **8**: 435-454.
- Gajer P, Brotman RM, Bai G, Sakamoto J, Schutte UM, Zhong X, Koenig SS, Fu L, Ma ZS, Zhou X et al. 2012. Temporal dynamics of the human vaginal microbiota. *Science translational medicine* **4**: 132ra152.
- Gardner SN, Slezak T, Hall BG. 2015. kSNP3.0: SNP detection and phylogenetic analysis of genomes without genome alignment or reference genome. *Bioinformatics* **31**: 2877-2878.
- Garrett WS, Gordon JI, Glimcher LH. 2010. Homeostasis and inflammation in the intestine. *Cell* **140**: 859-870.

- Hickey RJ, Zhou X, Pierson JD, Ravel J, Forney LJ. 2012. Understanding vaginal microbiome complexity from an ecological perspective. *Translational research : the journal of laboratory and clinical medicine* **160**: 267-282.
- Hillier SL, Nugent RP, Eschenbach DA, Krohn MA, Gibbs RS, Martin DH, Cotch MF, Edelman R, Pastorek JG, 2nd, Rao AV et al. 1995. Association between bacterial vaginosis and preterm delivery of a low-birth-weight infant. The Vaginal Infections and Prematurity Study Group. *The New England journal of medicine* **333**: 1737-1742.
- Horvath P, Barrangou R. 2010. CRISPR/Cas, the immune system of bacteria and archaea. *Science* **327**: 167-170.
- 10 Huber T, Faulkner G, Hugenholtz P. 2004. Bellerophon: a program to detect chimeric sequences in multiple sequence alignments. *Bioinformatics* **20**: 2317-2319.
- Hug LA, Baker BJ, Anantharaman K, Brown CT, Probst AJ, Castelle CJ, Butterfield CN, Hermsdorf AW, Amano Y, Ise K et al. 2016. A new view of the tree of life. *Nat Microbiol* **1**: 16048.
- 15 Human Microbiome Project C. 2012. Structure, function and diversity of the healthy human microbiome. *Nature* **486**: 207-214.
- Hyatt D, Chen GL, Locascio PF, Land ML, Larimer FW, Hauser LJ. 2010. Prodigal: prokaryotic gene recognition and translation initiation site identification. *BMC bioinformatics* **11**: 119.
- Hyman RW, Fukushima M, Jiang H, Fung E, Rand L, Johnson B, Vo KC, Caughey AB, Hilton JF, Davis RW et al. 2014. Diversity of the vaginal microbiome correlates with preterm birth. *Reproductive sciences* **21**: 32-40.
- 20 Jari Oksanen FGB, Michael Friendly, Roeland Kindt,, Pierre Legendre DM, Peter R. Minchin, R. B. O'Hara, Gavin L., Simpson PS, M. Henry H. Stevens, Eduard Szoecs and Helene, Wagner. 2017. vegan: Community Ecology Package.
- 25 Kanehisa M, Goto S. 2000. KEGG: kyoto encyclopedia of genes and genomes. *Nucleic Acids Res* **28**: 27-30.

Karginov FV, Hannon GJ. 2010. The CRISPR system: small RNA-guided defense in bacteria and archaea. *Mol Cell* **37**: 7-19.

Kearse M, Moir R, Wilson A, Stones-Havas S, Cheung M, Sturrock S, Buxton S, Cooper A, Markowitz S, Duran C et al. 2012. Geneious Basic: an integrated and extendable desktop software platform for the organization and analysis of sequence data. *Bioinformatics* **28**: 1647-1649.

Kolde R. 2015. pheatmap: Pretty Heatmaps.

Koren O, Goodrich JK, Cullender TC, Spor A, Laitinen K, Backhed HK, Gonzalez A, Werner JJ, Angenent LT, Knight R et al. 2012. Host remodeling of the gut microbiome and metabolic changes during pregnancy. *Cell* **150**: 470-480.

Krupovic M, Shmakov S, Makarova KS, Forterre P, Koonin EV. 2016. Recent Mobility of Casposons, Self-Synthesizing Transposons at the Origin of the CRISPR-Cas Immunity. *Genome Biol Evol* **8**: 375-386.

Langmead B. 2010. Aligning short sequencing reads with Bowtie. *Curr Protoc Bioinformatics* **Chapter 11**: Unit 11 17.

Li H, Durbin R. 2009. Fast and accurate short read alignment with Burrows-Wheeler transform. *Bioinformatics* **25**: 1754-1760.

Love MI, Huber W, Anders S. 2014. Moderated estimation of fold change and dispersion for RNA-seq data with DESeq2. *Genome Biol* **15**: 550.

Lowe TM, Eddy SR. 1997. tRNAscan-SE: a program for improved detection of transfer RNA genes in genomic sequence. *Nucleic Acids Res* **25**: 955-964.

Ma B, Forney LJ, Ravel J. 2012. Vaginal microbiome: rethinking health and disease. *Annual review of microbiology* **66**: 371-389.

Macklaim JM, Gloor GB, Anukam KC, Cribby S, Reid G. 2011. At the crossroads of vaginal health and disease, the genome sequence of *Lactobacillus iners* AB-1. *Proceedings of the National Academy of Sciences of the United States of America* **108 Suppl 1**: 4688-4695.

- Magrane M, Consortium U. 2011. UniProt Knowledgebase: a hub of integrated protein data.  
*Database : the journal of biological databases and curation* **2011**: bar009.
- Makarova KS, Wolf YI, Alkhnbashi OS, Costa F, Shah SA, Saunders SJ, Barrangou R, Brouns SJ, Charpentier E, Haft DH et al. 2015. An updated evolutionary classification of CRISPR-Cas systems. *Nature reviews Microbiology* **13**: 722-736.
- Malki K, Shapiro JW, Price TK, Hilt EE, Thomas-White K, Sircar T, Rosenfeld AB, Kuffel G, Zilliox MJ, Wolfe AJ et al. 2016. Genomes of Gardnerella Strains Reveal an Abundance of Prophages within the Bladder Microbiome. *PloS one* **11**: e0166757.
- Marraffini LA, Sontheimer EJ. 2010. CRISPR interference: RNA-directed adaptive immunity in bacteria and archaea. *Nature reviews Genetics* **11**: 181-190.
- McMurdie PJ, Holmes S. 2013. phyloseq: an R package for reproducible interactive analysis and graphics of microbiome census data. *PloS one* **8**: e61217.
- Miller CS, Baker BJ, Thomas BC, Singer SW, Banfield JF. 2011. EMIRGE: reconstruction of full-length ribosomal genes from microbial community short read sequencing data. *Genome Biol* **12**: R44.
- Mojica FJ, Diez-Villasenor C, Garcia-Martinez J, Soria E. 2005. Intervening sequences of regularly spaced prokaryotic repeats derive from foreign genetic elements. *J Mol Evol* **60**: 174-182.
- Moriya Y, Itoh M, Okuda S, Yoshizawa AC, Kanehisa M. 2007. KAAS: an automatic genome annotation and pathway reconstruction server. *Nucleic Acids Res* **35**: W182-185.
- Nuriel-Ohayon M, Neuman H, Koren O. 2016. Microbial Changes during Pregnancy, Birth, and Infancy. *Front Microbiol* **7**: 1031.
- Ojala T, Kankainen M, Castro J, Cerca N, Edelman S, Westerlund-Wikstrom B, Paulin L, Holm L, Auvinen P. 2014. Comparative genomics of Lactobacillus crispatus suggests novel mechanisms for the competitive exclusion of Gardnerella vaginalis. *BMC Genomics* **15**: 1070

- Olm MR, Brown CT, Brooks B, Firek B, Baker R, Burstein D, Soenjoyo K, Thomas BC, Morowitz M, Banfield JF. 2017. Identical bacterial populations colonize premature infant gut, skin, and oral microbiomes and exhibit different in situ growth rates. *Genome Research* **27**: 601-612.
- 5 Parks DH, Imelfort M, Skennerton CT, Hugenholtz P, Tyson GW. 2015. CheckM: assessing the quality of microbial genomes recovered from isolates, single cells, and metagenomes. *Genome Research* **25**: 1043-1055.
- Peng Y, Leung HC, Yiu SM, Chin FY. 2012. IDBA-UD: a de novo assembler for single-cell and metagenomic sequencing data with highly uneven depth. *Bioinformatics* **28**: 1420-1428.
- 10 Pourcel C, Salvignol G, Vergnaud G. 2005. CRISPR elements in *Yersinia pestis* acquire new repeats by preferential uptake of bacteriophage DNA, and provide additional tools for evolutionary studies. *Microbiology* **151**: 653-663.
- Price MN, Dehal PS, Arkin AP. 2009. FastTree: computing large minimum evolution trees with profiles instead of a distance matrix. *Mol Biol Evol* **26**: 1641-1650.
- 15 Pride DT, Sun CL, Salzman J, Rao N, Loomer P, Armitage GC, Banfield JF, Relman DA. 2011. Analysis of streptococcal CRISPRs from human saliva reveals substantial sequence diversity within and between subjects over time. *Genome research* **21**: 126-136.
- Pruesse E, Quast C, Knittel K, Fuchs BM, Ludwig W, Peplies J, Glockner FO. 2007. SILVA: a comprehensive online resource for quality checked and aligned ribosomal RNA sequence data compatible with ARB. *Nucleic Acids Res* **35**: 7188-7196.
- 20 Ravel J, Gajer P, Abdo Z, Schneider GM, Koenig SS, McCulle SL, Karlebach S, Gorle R, Russell J, Tacket CO et al. 2011. Vaginal microbiome of reproductive-age women. *Proceedings of the National Academy of Sciences of the United States of America* **108 Suppl 1**: 4680-4687.
- 25 Raymond KN, Dertz EA, Kim SS. 2003. Enterobactin: an archetype for microbial iron transport. *Proceedings of the National Academy of Sciences of the United States of America* **100**: 3584-3588.



- Rho M, Wu YW, Tang H, Doak TG, Ye Y. 2012. Diverse CRISPRs evolving in human microbiomes. *PLoS Genet* **8**: e1002441.
- Robles-Sikisaka R, Ly M, Boehm T, Naidu M, Salzman J, Pride DT. 2013. Association between living environment and human oral viral ecology. *ISME Journal* **7**: 1710-1724.
- 5 Romero R, Hassan SS, Gajer P, Tarca AL, Fadrosh DW, Nikita L, Galuppi M, Lamont RF, Chaemsaihong P, Miranda J et al. 2014. The composition and stability of the vaginal microbiota of normal pregnant women is different from that of non-pregnant women. *Microbiome* **2**: 4.
- Santiago GL, Deschaght P, El Aila N, Kiama TN, Verstraelen H, Jefferson KK, Temmerman M,  
10 Vaneechoutte M. 2011. Gardnerella vaginalis comprises three distinct genotypes of which only two produce sialidase. *American journal of obstetrics and gynecology* **204**: 450 e451-457.
- Schellenberg JJ, Paramel Jayaprakash T, Withana Gamage N, Patterson MH, Vaneechoutte M, Hill JE. 2016. Gardnerella vaginalis Subgroups Defined by cpn60 Sequencing and  
15 Sialidase Activity in Isolates from Canada, Belgium and Kenya. *PloS one* **11**: e0146510.
- Schwebke JR, Muzny CA, Josey WE. 2014. Role of Gardnerella vaginalis in the pathogenesis of bacterial vaginosis: a conceptual model. *Journal of infectious diseases* **210**: 338-343.
- Skenneron CT, Imelfort M, Tyson GW. 2013. Crass: identification and reconstruction of CRISPR from unassembled metagenomic data. *Nucleic Acids Res* **41**: e105.
- 20 Smith SB, Ravel J. 2017. The vaginal microbiota, host defence and reproductive physiology. *J Physiol* **595**: 451-463.
- Sun CL, Thomas BC, Barrangou R, Banfield JF. 2016. Metagenomic reconstructions of bacterial CRISPR loci constrain population histories. *ISME Journal* **10**: 858-870.
- Treangen TJ, Ondov BD, Koren S, Phillippy AM. 2014. The Harvest suite for rapid core-genome  
25 alignment and visualization of thousands of intraspecific microbial genomes. *Genome Biol* **15**: 524.

Weinbauer MG, Rassoulzadegan F. 2004. Are viruses driving microbial diversification and diversity? *Environ Microbiol* **6**: 1-11.

Wright ES, Yilmaz LS, Noguera DR. 2012. DECIPHER, a search-based approach to chimera identification for 16S rRNA sequences. *Applied and environmental microbiology* **78**: 717-725.

Yeoman CJ, Yildirim S, Thomas SM, Durkin AS, Torralba M, Sutton G, Buhay CJ, Ding Y, Dugan-Rocha SP, Muzny DM et al. 2010. Comparative genomics of *Gardnerella vaginalis* strains reveals substantial differences in metabolic and virulence potential. *PloS one* **5**: e12411.

Zhou X, Brown CJ, Abdo Z, Davis CC, Hansmann MA, Joyce P, Foster JA, Forney LJ. 2007. Differences in the composition of vaginal microbial communities found in healthy Caucasian and black women. *ISME Journal* **1**: 121-133.
